# Supplementary material for: Adsorption of CO, SO2, HCN, NH3, and H2CO on zigzag GaP nanotubes: a QM/MM study
Source: Royal Society of Chemistry journal article supplement (doi:10.1039/c4ra09706h), 2014-10-23
Supplement: c4ra09706h1.pdf [file c4ra09706h1.pdf]

# Adsorption of CO, SO<sub>2</sub>, HCN, NH<sub>3</sub>, and H<sub>2</sub>CO on zigzag GaP nanotubes : a QM/MM study

Pabitra Narayan Samanta<sup>a</sup>, Kalyan Kumar Das<sup>a\*</sup>

<sup>a</sup>*Department of Chemistry, Physical Chemistry Section, Jadavpur University, Kolkata 700 032, India*

E-mail address: [kkdas@chemistry.jdvu.ac.in](mailto:kkdas@chemistry.jdvu.ac.in)

**Electronic Supplementary Information (ESI)**

**RSC Adv.**

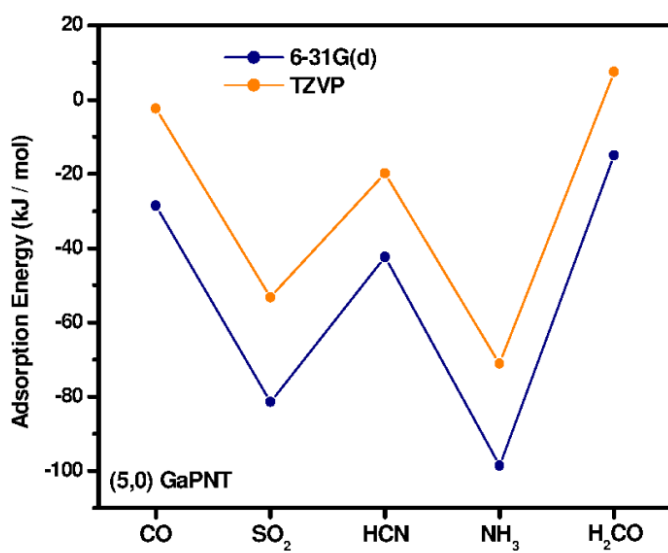

**Fig. S1** Comparison of adsorption energies for (5,0)GaPNT computed with 6-31G(d) and TZVP basis sets.

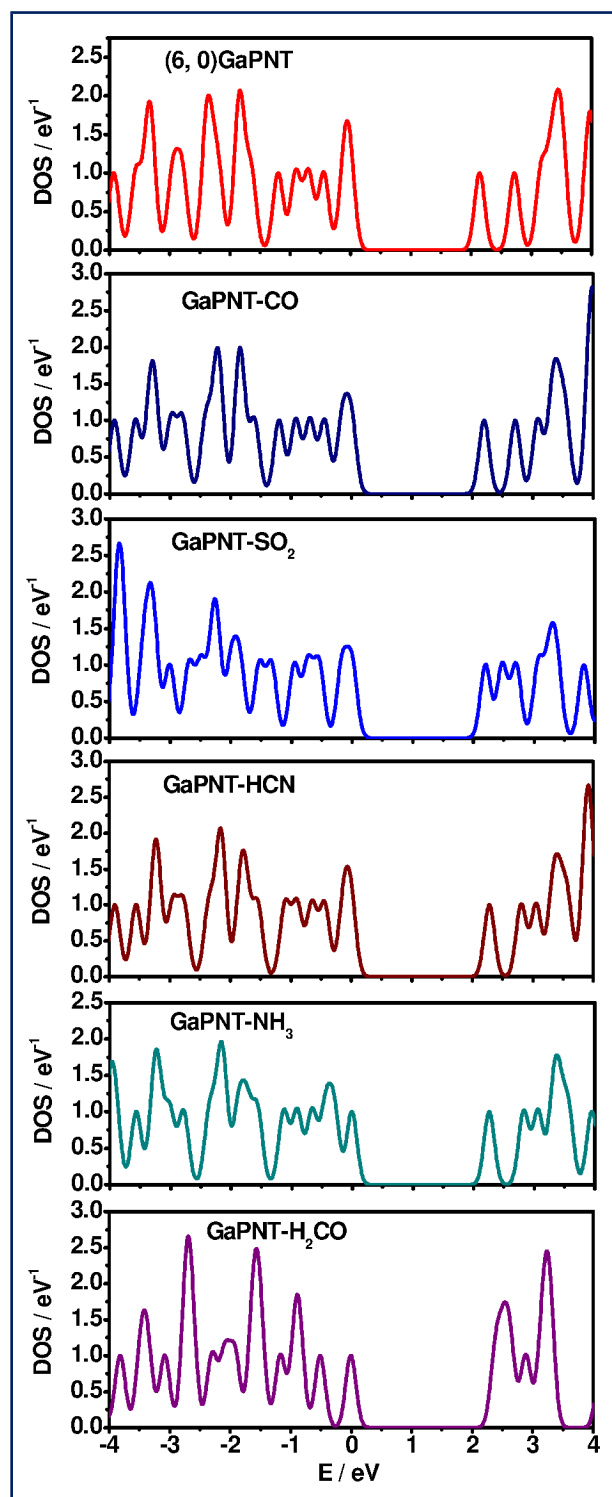

**Fig. S2** Density of states (DOS) plots for the bare (6,0)GaPNT and its adsorbed complexes.

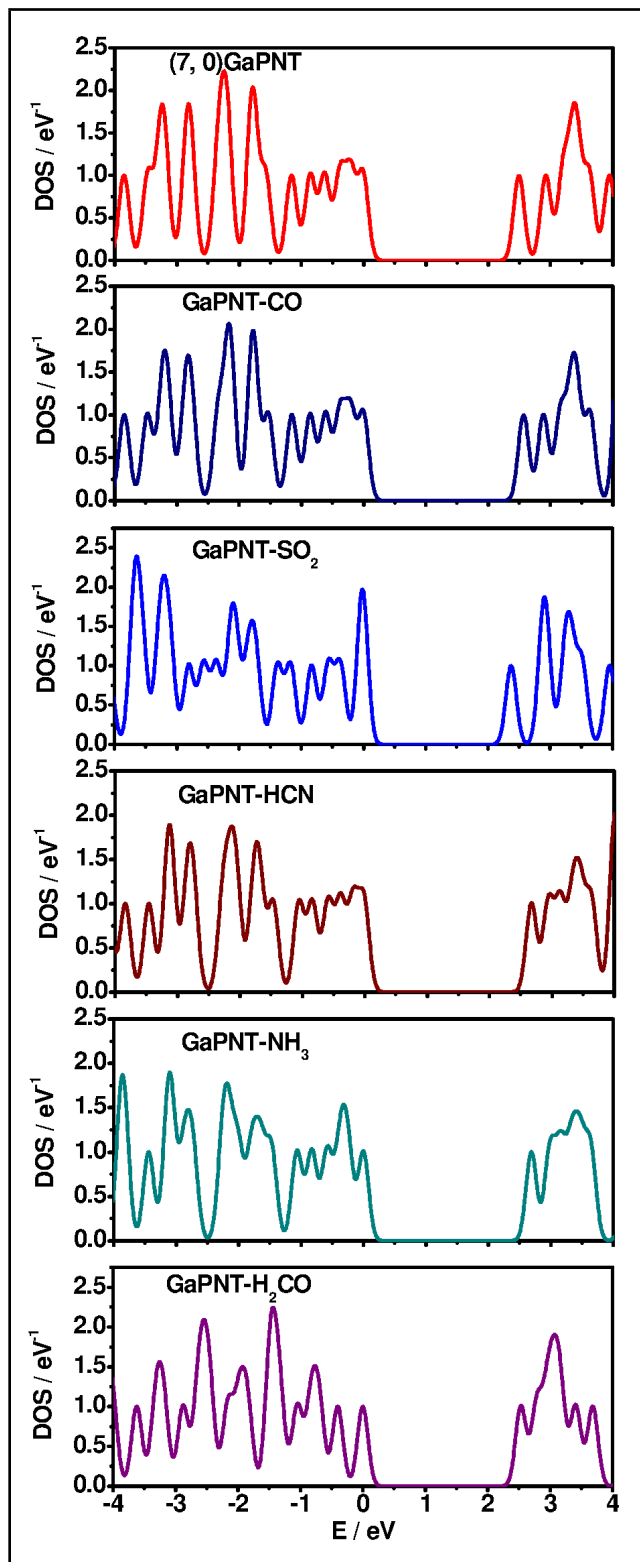

**Fig. S3** Density of states (DOS) plots for the bare (7,0)GaPNT and its adsorbed complexes.

**Table S1**

Calculated adsorption energy ( $E_a$ ) and Gibbs free energy change ( $\Delta G_a$ ) for the adsorption of gas molecules on (n,0)GaPNTs (n=5-7) at the ONIOM(wB97XD/6-31G(d):UFF) level of theory. All the values are in kJ/mol.

| Adsorbate Molecule | (5, 0)GaPNT |              | (6, 0)GaPNT |              | (7, 0)GaPNT |              |
|--------------------|-------------|--------------|-------------|--------------|-------------|--------------|
|                    | $E_a$       | $\Delta G_a$ | $E_a$       | $\Delta G_a$ | $E_a$       | $\Delta G_a$ |
| CO                 | -47.8       | -11.3        | -44.4       | -9.5         | -39.3       | -4.1         |
| SO <sub>2</sub>    | -96.3       | -40.4        | -88.2       | -32.9        | -87.2       | -37.5        |
| HCN                | -71.5       | -31.2        | -67.0       | -26.7        | -51.3       | -5.3         |
| NH <sub>3</sub>    | -139.8      | -99.9        | -135.2      | -94.9        | -124.4      | -84.4        |
| H <sub>2</sub> CO  | -46.5       | 2.1          | -46.0       | 2.4          | -34.7       | 16.9         |

**Table S2**

Computed HOMO-LUMO energy gap  $E_g$  (eV) and Mulliken charge transfer ( $Q_T$ ) for the most stable (n,0)GaPNT (n=5-7) adsorbate complexes at the ONIOM(wB97XD/6-31G(d):UFF) level of theory.

| Adsorbate Molecule | (5, 0)GaPNT |       | (6, 0)GaPNT |       | (7, 0)GaPNT |       |
|--------------------|-------------|-------|-------------|-------|-------------|-------|
|                    | $E_g$       | $Q_T$ | $E_g$       | $Q_T$ | $E_g$       | $Q_T$ |
| CO                 | 6.74        | 0.19  | 6.77        | 0.17  | 7.02        | 0.15  |
| SO <sub>2</sub>    | 6.55        | -0.32 | 6.62        | -0.32 | 6.69        | -0.32 |
| HCN                | 6.81        | 0.17  | 6.85        | 0.18  | 7.13        | 0.18  |
| NH <sub>3</sub>    | 6.82        | 0.25  | 6.86        | 0.25  | 7.13        | 0.26  |
| H <sub>2</sub> CO  | 6.58        | -0.37 | 6.68        | -0.37 | 6.60        | -0.36 |
| Pure nanotube      | 6.57        |       | 6.64        |       | 6.94        |       |
